# Supplementary material
Source: PubMed Central journal article supplement (PMC3365426)

# Source Data Figure 6

## Figure 6A

WB : Myc

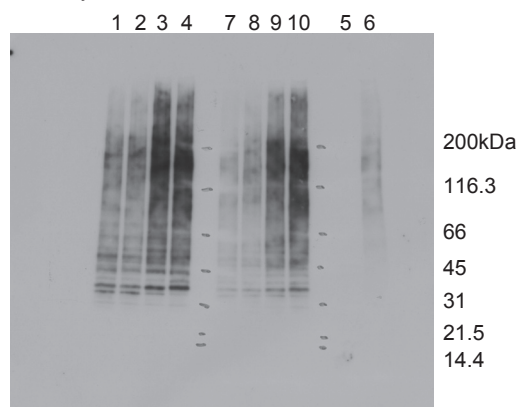

WB : Flag

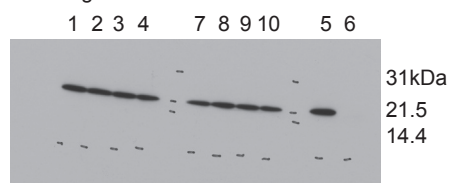

## Figure 6B

WB : Myc

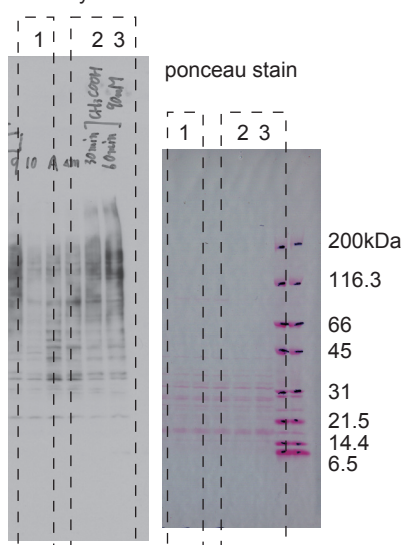

## Figure 6C and D input

WB : Myc

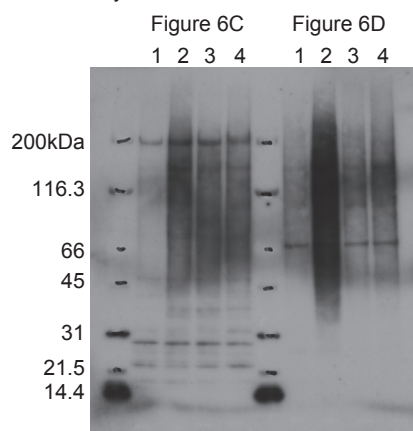

WB : Flag

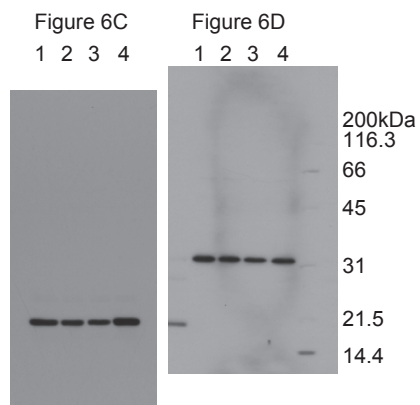

## Figure 6C and D IP : Flag

WB : Myc

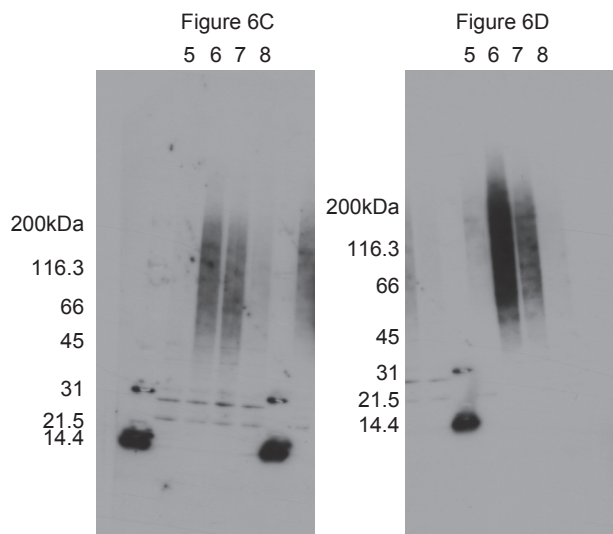

WB : Flag

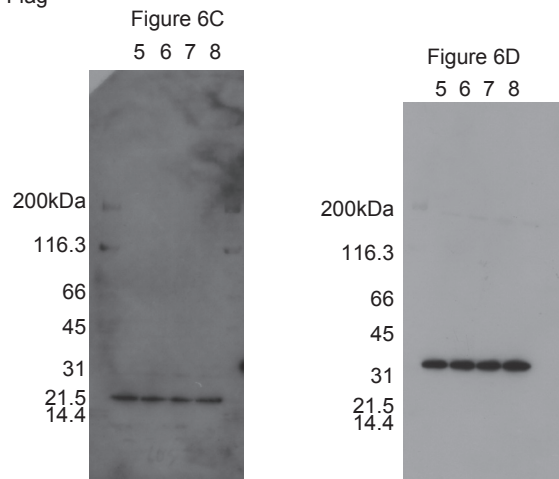

Supplement: emboj201285s7.pdf [file emboj201285s7.pdf]
