# Supplementary material
Source: PubMed Central journal article supplement (PMC3365426)

# Source Data Figure 1

Figure 1C

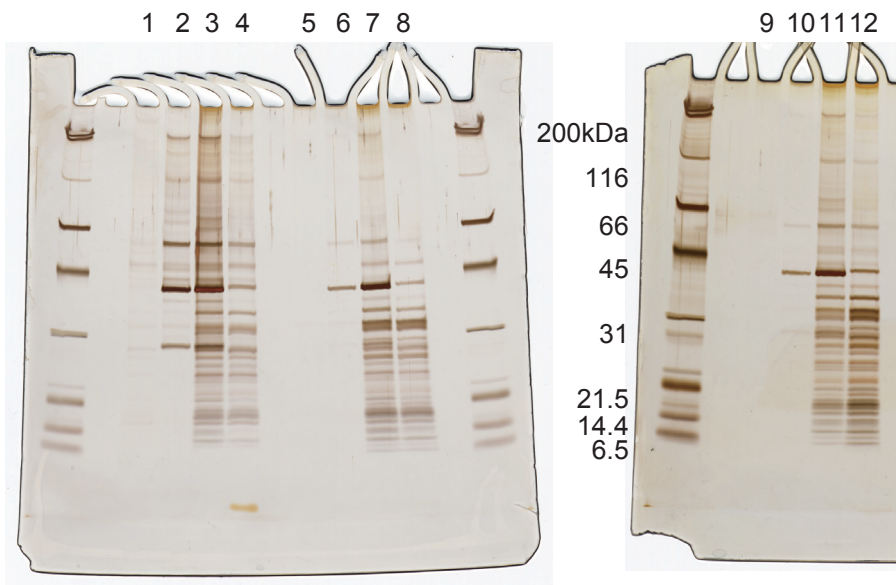

Figure 1D

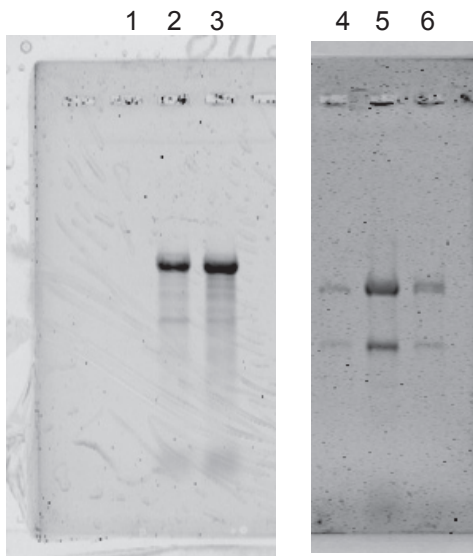

Figure 1E

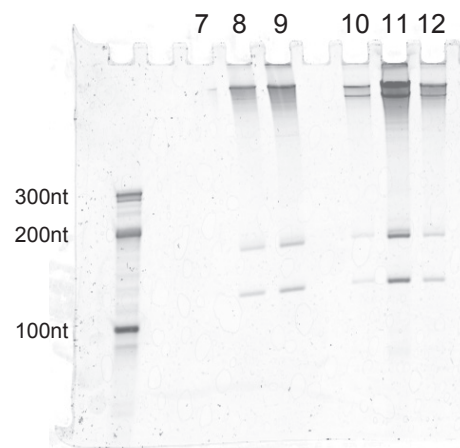

Supplement: emboj201285s2.pdf [file emboj201285s2.pdf]

# Source Data Figure 2

Figure 2A

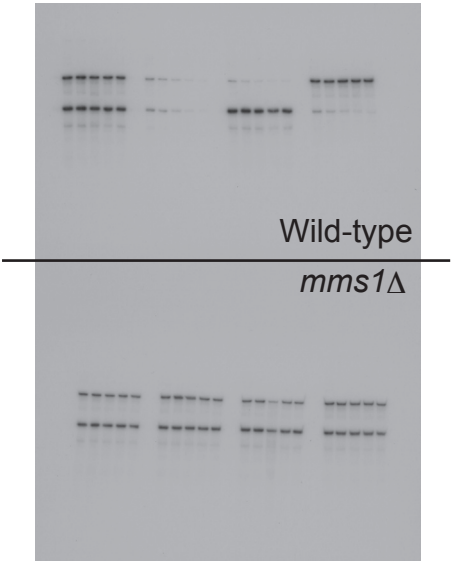

Figure 2B

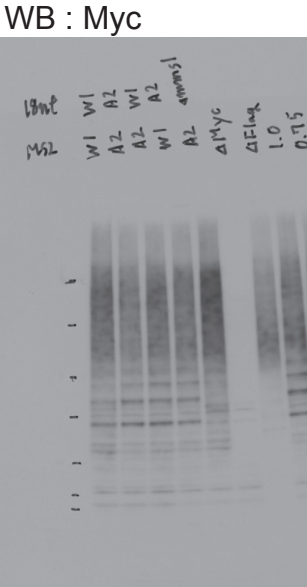

Figure 2C

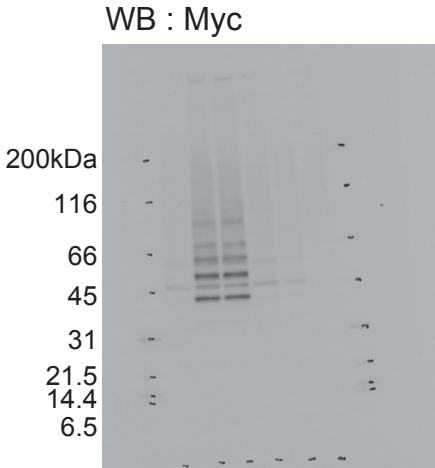

WB : Flag

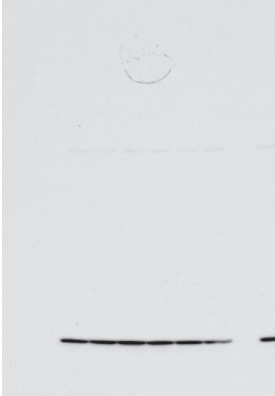

WB : Flag

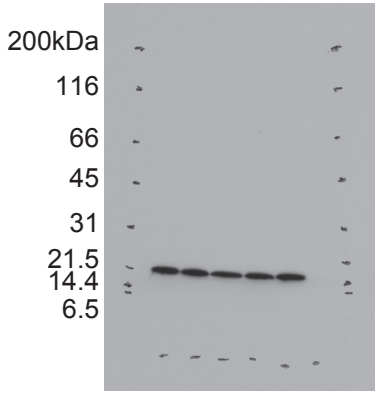

Supplement: emboj201285s3.pdf [file emboj201285s3.pdf]

# Source Data Figure 3

Figure 3B

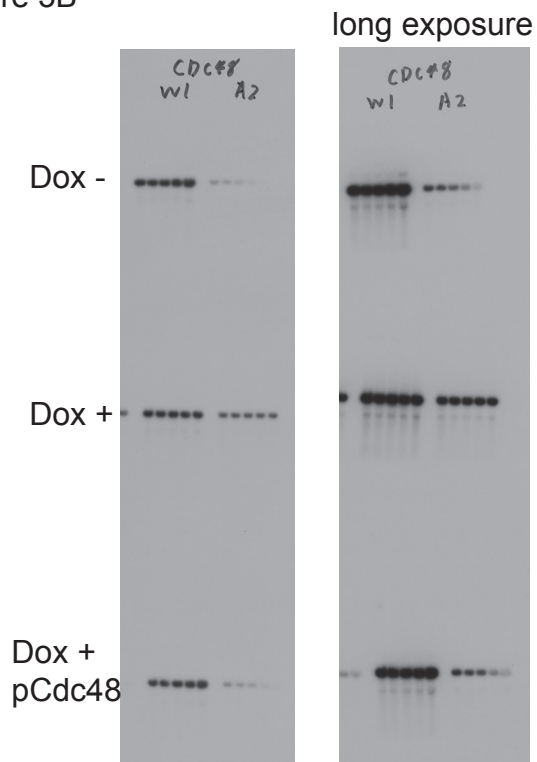

Figure 3C

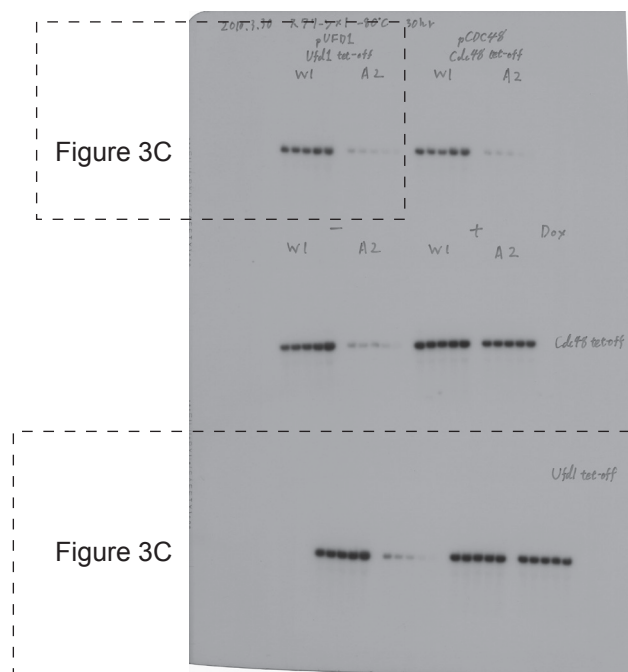

Figure 3C long exposure

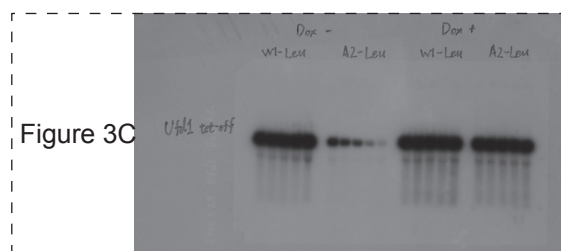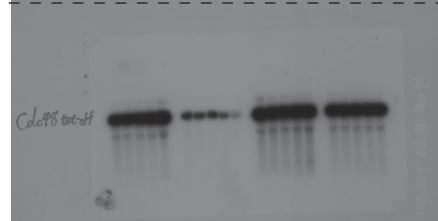

Figure 3D

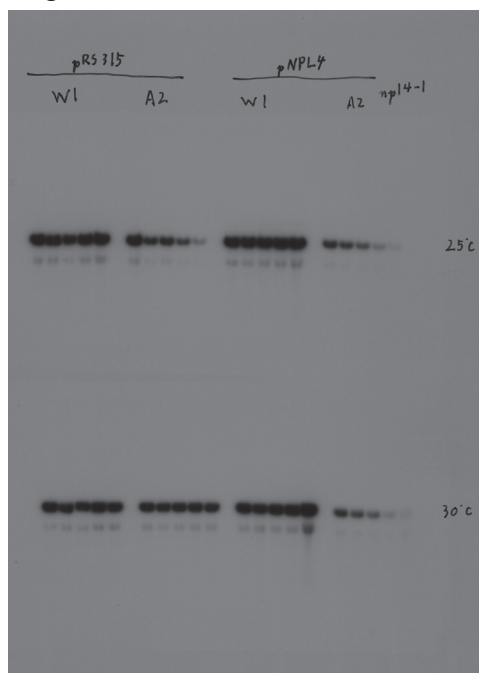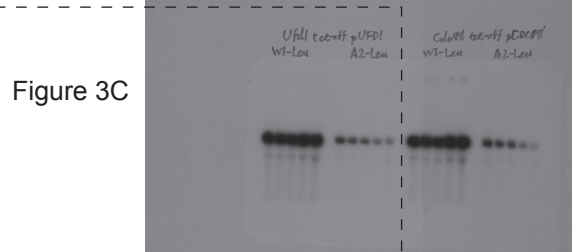

Supplement: emboj201285s4.pdf [file emboj201285s4.pdf]

# Source Data Figure 4

Figure 4A

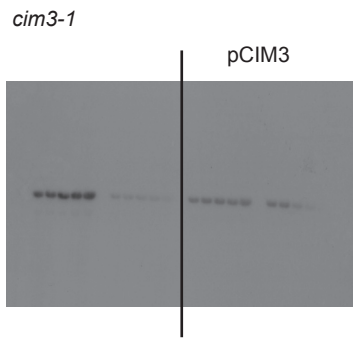

Figure 4B

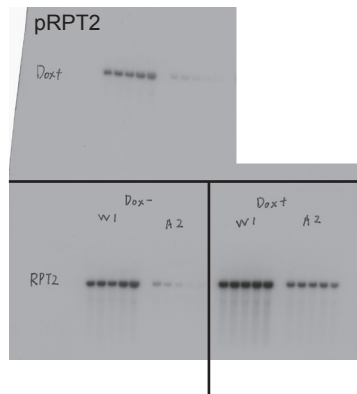

Figure 4C

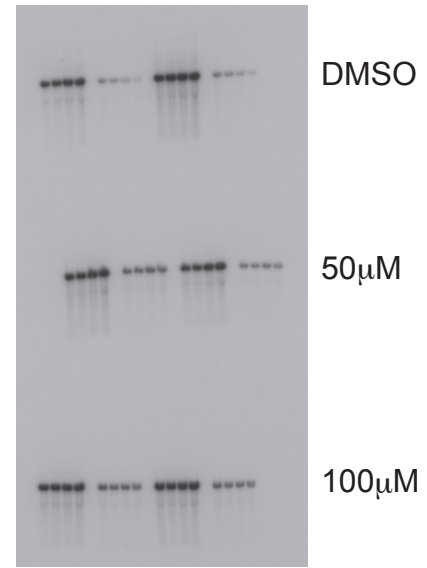

Figure 4D

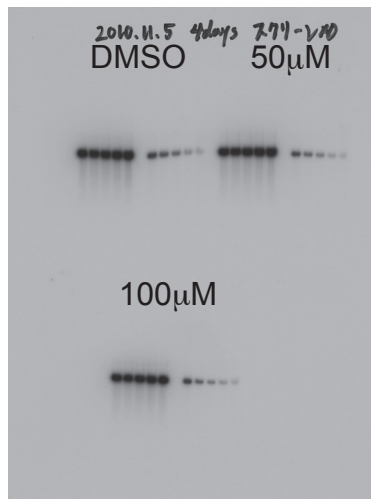

Figure 4F

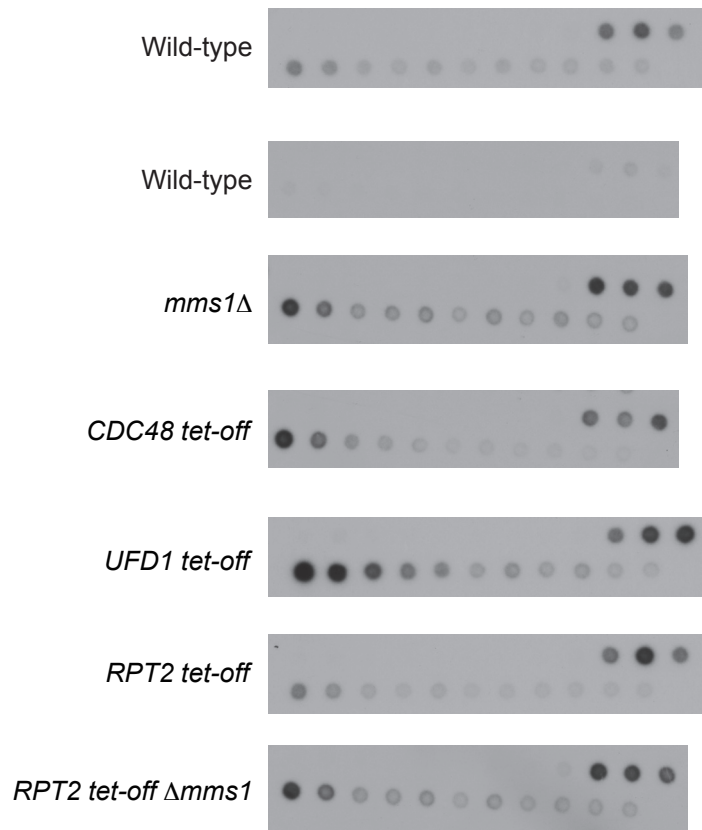

Supplement: emboj201285s5.pdf [file emboj201285s5.pdf]

# Source Data Figure 5

Figure 5A

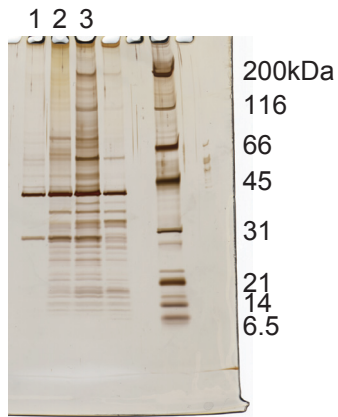

Figure 5B

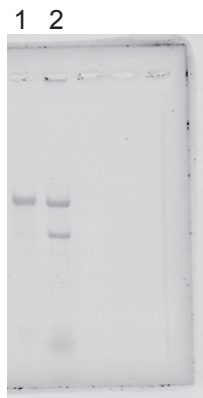

Figure 5C

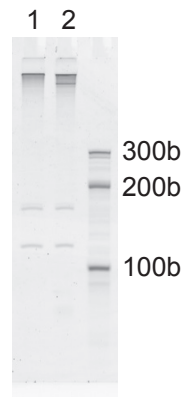

Figure 5D

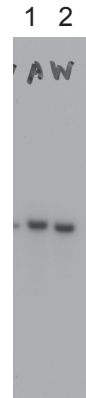

Figure 5E

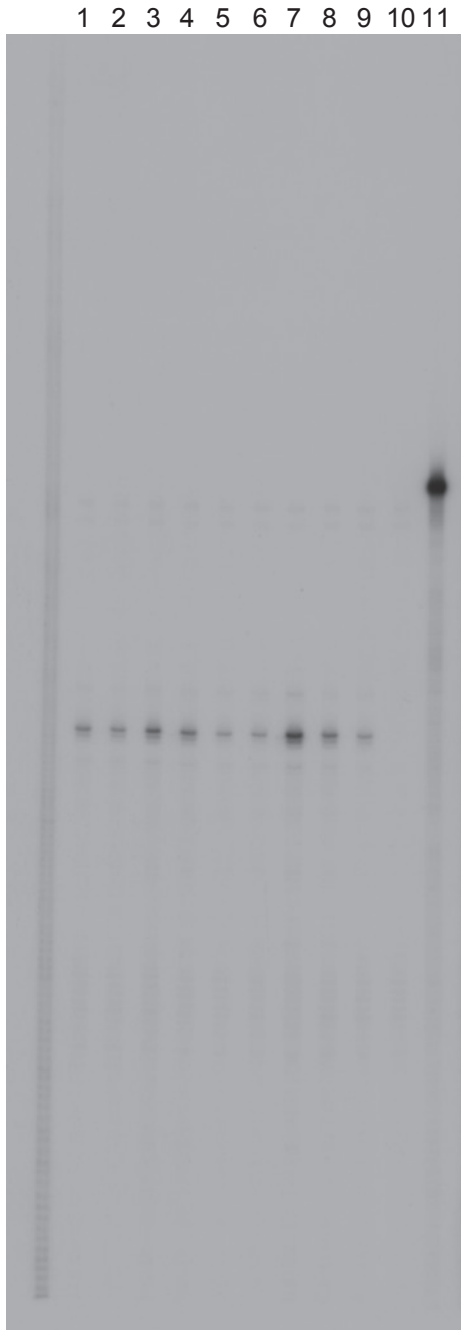

Figure 5F

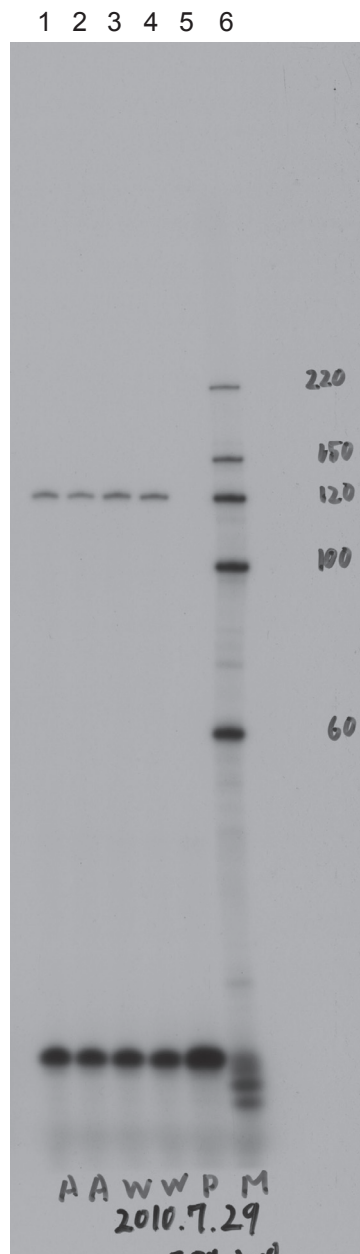

Figure 5G

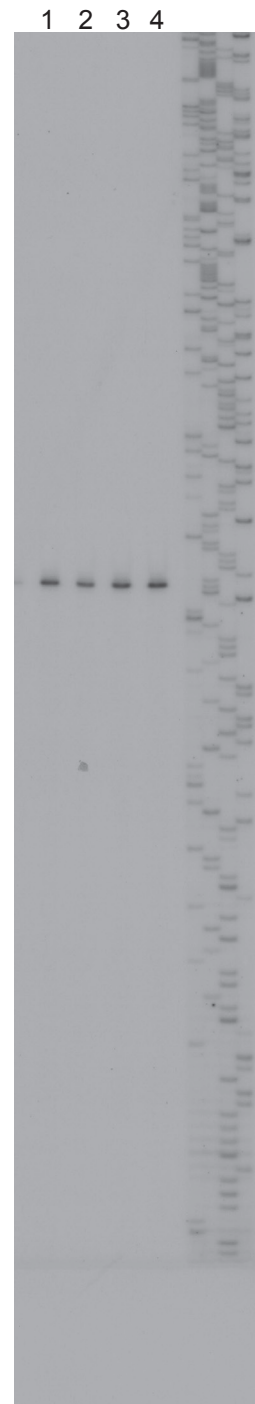

Supplement: emboj201285s6.pdf [file emboj201285s6.pdf]
